# Supplementary material for: The inhibiting effect of neural stem cells on proliferation and invasion of glioma cells
Source: PubMed Central journal article supplement (PMC5652754; doi:10.18632/oncotarget.20270), 2017-08-14
Supplement: oncotarget-08-76949-s001.pdf [file oncotarget-08-76949-s001.pdf]

## The inhibiting effect of neural stem cells on proliferation and invasion of glioma cells

### SUPPLEMENTARY MATERIALS

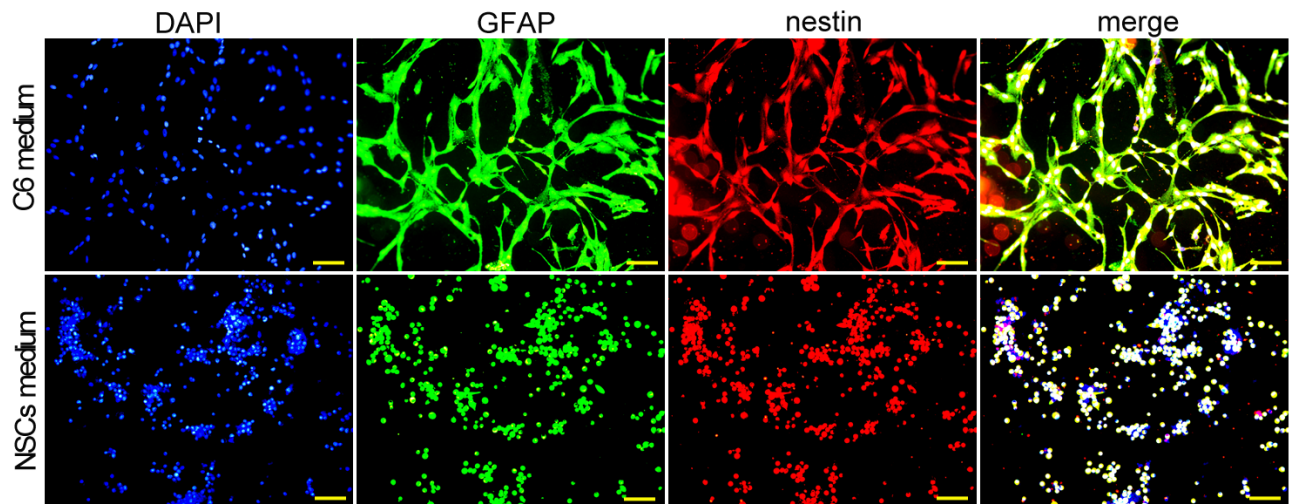

Supplementary Figure 1: Almost all of C6 glioma cells were nestin positive both in their original medium and serum free NSC medium.
